# Supplementary material
Source: ML conference proceedings conference paper supplement (https://openaccess.thecvf.com/content/CVPR2024/html/Xie_JointSQ_Joint_Sparsification-Quantization_CVPR_2024_paper.html)
Supplement: Supplementary file 1 [file Xie_JointSQ_Joint_Sparsification-Quantization_CVPR_2024_supplemental.pdf]

## A. Appendix

### A.1. Proof of Unbiasedness and Convergence for JointSQ

Our quantizer selection is similar to the random uniform quantizer as referenced in [1]. We first prove the unbiasedness and convergence for the general form of Co-compressor. For a gradient vector  $\mathbf{g}$ , the  $i$ -th gradient element is quantized as follows:

$$Q_b [g_i] = \|\mathbf{g}\| \cdot \text{sgn}(g_i) \cdot \zeta(g_i, s),$$

where  $\|\mathbf{g}\|$  is the  $l_2$  norm of  $\mathbf{g}$ ;  $\text{sgn}(g_i) = \{+1, -1\}$  is the sign of  $g_i$ ;  $s$  is the quantization level. If we use  $b$  bits to quantize  $g_i$ , we will use one bit to represent its sign and the other  $b - 1$  bits to represent  $\zeta(g_i, s)$ , thus resulting in a quantization level  $s = 2^{b-1} - 1$ . And  $\zeta(g_i, s)$  is an unbiased stochastic function that maps scalar  $|g_i|/\|\mathbf{g}\|$  to one of the values in set  $\{0, 1/s, 2/s, \dots, s/s\}$ : if  $|g_i|/\|\mathbf{g}\| \in [l/s, (l+1)/s]$ , we have:

$$\zeta(g_i, s) = \begin{cases} l/s, & \text{with probability } 1 - p_r, \\ (l+1)/s, & \text{with probability } p_r = s \frac{|g_i|}{\|\mathbf{g}\|} - l. \end{cases}$$

So we have:

$$\begin{aligned} \mathbb{E} [\zeta(g_i, s)] &= \frac{l}{s} \left[ 1 - s \frac{|g_i|}{\|\mathbf{g}\|} + l \right] \\ &\quad + \frac{l+1}{s} \left[ s \frac{|g_i|}{\|\mathbf{g}\|} - l \right] = \frac{|g_i|}{\|\mathbf{g}\|}. \end{aligned}$$

Then:

$$\begin{aligned} \mathbb{E} [\zeta(g_i, s)^2] &= \mathbb{E} [\zeta(g_i, s)]^2 + \mathbb{V} [\zeta(g_i, s)] \\ &= \frac{|g_i|^2}{\|\mathbf{g}\|^2} + \frac{1}{s^2} p(1-p) \\ &\leq \frac{|g_i|^2}{\|\mathbf{g}\|^2} + \frac{1}{4s^2}. \end{aligned}$$

Considering that  $Q_s(g_i) = \|\mathbf{g}\| \cdot \text{sgn}(g_i) \cdot \zeta(g_i, s)$ , we have:

$$\begin{aligned} \mathbb{E} [\|Q_b[\mathbf{g}]\|^2] &= \sum_{i=0}^d \mathbb{E} [\|\mathbf{g}\|^2 \zeta(g_i, s)^2] \\ &\leq \sum_{i=0}^d \|\mathbf{g}\|^2 \left( \frac{|g_i|^2}{\|\mathbf{g}\|^2} + \frac{1}{4s^2} \right) \\ &= \|\mathbf{g}\|^2 + \frac{d}{4s^2} \|\mathbf{g}\|^2. \end{aligned}$$

We can get:

$$\begin{aligned} \mathbb{E} [Q_b[\mathbf{g}]] &= \mathbf{g}, \\ \mathbb{E} [\|Q_b[\mathbf{g}]\|^2] &\leq \left[ 1 + \frac{d}{4^b} \right] \|\mathbf{g}\|^2. \end{aligned}$$

In the proof presented in [1], the sparsifier is set as the Rand- $k$  sparsifier with an amplification factor of  $d/k$ . Here, we generalize it to a general unbiased sparsifier. For the stochastic gradient vector  $\mathbf{g}$ , with a sparsification parameter of  $k$ , we have the following expression:

$$\begin{aligned} \mathbb{E} [S_k(\mathbf{g})] &= \mathbf{g}, \\ \mathbb{E} [\|S_k(\mathbf{g})\|^2] &\leq \|\mathbf{g}\|^2. \end{aligned}$$

Therefore, for the general form of the Co-compressor that utilizes uniform random quantization and unbiased sparsification, we obtain:

$$E[\hat{\mathbf{g}}] = \mathbb{E} [Q_b [S_k(\mathbf{g})]] = \mathbb{E} [S_k(\mathbf{g})] = \mathbf{g}, \quad (1)$$

$$\begin{aligned} E [\|\hat{\mathbf{g}}\|^2] &= \mathbb{E} [\|Q_b [S_k(\mathbf{g})]\|^2] \leq \left[ 1 + \frac{k}{4^b} \right] \|S_k(\mathbf{g})\|^2 \\ &= \left[ 1 + \frac{k}{4^b} \right] \|\mathbf{g}\|^2. \end{aligned} \quad (2)$$

Eq. (17) demonstrates the unbiasedness for Co-compressor and Eq. (18) provides the convergence analysis for Co-compressor.

Our JointSQ framework treats sparsity as 0-bit quantization and introduces the idea of mixed-precision quantization. We split the gradient vector  $\mathbf{g}$  into several subgradients  $\mathbf{g}_i$  of length  $k_i$  and quantize them with different bit-width  $b_i$ . For example, the gradient vector  $\{0.1, 0.2, 0.3, 0.4\}$  can be split into  $\{0.1, 0.2\}$  and  $\{0.3, 0.4\}$ . For ease of analysis, we set the remaining positions of the subgradients to 0 to match the length of the original gradient vector. Thus, we have  $\mathbf{g} = \sum_{i=1}^n \mathbf{g}_i$ , where  $n$  is the number of quantization bit levels. For JointSQ, we analyze its unbiasedness:

$$E[\hat{\mathbf{g}}] = E \left[ \sum_{i=1}^n \hat{\mathbf{g}}_i \right] = \sum_{i=1}^n E(\hat{\mathbf{g}}_i).$$

Based on the unbiasedness for the general form of the Co-compressor, as shown in Eq. (17), we know that  $E(\hat{\mathbf{g}}_i) = \mathbf{g}_i$ . So we have:

$$E[\hat{\mathbf{g}}] = \sum_{i=1}^n \mathbf{g}_i = \mathbf{g}. \quad (3)$$

Based on the definition of the Euclidean norm (L2 norm), we have  $\|\mathbf{g}\|^2 = \sum_{i=1}^n \|\mathbf{g}_i\|^2$ . Therefore:

$$\begin{aligned} E [\|\hat{\mathbf{g}}\|^2] &= E \left[ \sum_{i=1}^n \|\mathbf{g}_i\|^2 \right] \\ &= \sum_{i=1}^n E [\|\mathbf{g}_i\|^2]. \end{aligned}$$

Based on the convergence for the general form of the Co-compressor, as shown in Eq. (18), we obtain:

$$E \left[ \|\mathbf{g}_i\|^2 \right] \leq \left[ 1 + \frac{k}{4^b} \right] \|\mathbf{g}_i\|^2.$$

Therefore:

$$E \left[ \|\hat{\mathbf{g}}\|^2 \right] \leq \sum_{i=1}^n \left[ 1 + \frac{k}{4^b} \right] \|\mathbf{g}_i\|^2. \quad (4)$$

Eq. (19) demonstrates the unbiasedness for JointSQ and Eq. (20) provides the convergence analysis for the JointSQ.

## A.2. Proof of Improved Convergence for JointSQ

To contrast with the general form of a Co-compressor, we assume that the gradient tensor  $\mathbf{g}$  is compressed using a Co-compressor with sparsity parameter  $k$  and quantization bit-width  $b$ . According to Eq. (3) in the main text, the compression noise in this case is obtained as follows:

$$\begin{aligned} h(k, b) &\triangleq \frac{k}{4^b} \\ &= \frac{k-2}{4^b} \frac{\|\mathbf{g}'\|^2}{\|\mathbf{g}\|^2} + \frac{1}{4^b} \frac{\|g_1\|^2}{\|\mathbf{g}\|^2} + \frac{1}{4^b} \frac{\|g_2\|^2}{\|\mathbf{g}\|^2}. \end{aligned}$$

In this particular case, we consider a scenario where we only change the quantization bit-width of two gradient elements in the compressed gradient. We quantize one gradient element, denoted as  $g_1$ , which is originally quantized to  $b$  bits, to  $b+x$  bits, where  $x \in \mathbb{N}^*$ , and we quantize another gradient element, denoted as  $g_2$ , to  $b-x$  bits. According to Eq. (6) in the main text, the compression noise in this case can be derived as follows:

$$h'(k, b) \triangleq \frac{k-2}{4^b} \frac{\|\mathbf{g}'\|^2}{\|\mathbf{g}\|^2} + \frac{1}{4^{b+x}} \frac{\|g_1\|^2}{\|\mathbf{g}\|^2} + \frac{1}{4^{b-x}} \frac{\|g_2\|^2}{\|\mathbf{g}\|^2}.$$

The variation of compressed noise is:

$$\Delta h' = \left( \frac{1}{4^{b+x}} - \frac{1}{4^b} \right) \frac{g_1^2}{\|\mathbf{g}\|^2} + \left( \frac{1}{4^{b-x}} - \frac{1}{4^b} \right) \frac{g_2^2}{\|\mathbf{g}\|^2}.$$

By solving the inequality  $\Delta h' < 0$ , we obtain the following result:

$$|g_1| > 2^x |g_2|. \quad (5)$$

This provides a case where the convergence for JointSQ is superior to the general form of Co-compressor. In fact, this conclusion can be generalized to reducing the bit-width of multiple gradient elements to improve the bit-width of multiple gradient elements:

$$\sum_{i=1}^{n_1} \frac{4^{x_i} - 1}{4^{x_i}} |g_i|^2 > \sum_{j=1}^{n_2} (4^{y_j} - 1) |g_j|^2.$$

where  $x_1 + x_2 + \dots + x_{n_1} = y_1 + y_2 + \dots + y_{n_2}$ . This finding demonstrates the significant contribution of JointSQ in expanding the solution space and mitigating the occurrence of suboptimal solutions in Co-compressor.

## A.3. Core Algorithm of JointSQ

### A.3.1 Greedy Allocation

---

#### Algorithm 1 Greedy Allocation

---

**Input:** Assignable bit-width  $c$ , gradient vector  $\mathbf{g}$ .

**Output:** Mixed-Precision quantization mask  $x$ , gradient sorting results  $SP'$ .

- 1:  $Remain\_bit \leftarrow c$  // Remain backpack capacity.
  - 2:  $x_{i1} \leftarrow 1$  // Default Selection of 0-bit per Group.
  - 3:  $B \leftarrow [0, 2, 4, 8], b_j \in B$  // Available quantization bit widths.
  - 4:  $\rho_{ij} \leftarrow \frac{4^{w_{ij}} - 1}{4^{w_{ij}}} \frac{g_i^2}{\|\mathbf{g}\|^2}, w_{ij} \leftarrow b_j$  // Profit and weight of items.
  - 5:  $SP \leftarrow argsort\left(\frac{p_{ij} - p_{i,j-1}}{w_{ij} - w_{i,j-1}}\right)$  // Sort by Incremental Profit Density.
  - 6:  $SP' \leftarrow SP$
  - 7: **while**  $Remain\_bit > 0$  **do**
  - 8:      $i, j \leftarrow SP[0], x_{i,j} \leftarrow 1, x_{i,j-1} \leftarrow 0$  // Select the
  - 9:     item with the highest rank.
  - 10:      $SP \leftarrow Update(SP)$  // Remove the  $j$ -th item in
  - 11:      $i$ -th group from the selection pool.
  - 12:      $Remain\_bit \leftarrow Remain\_bit - w_{i,j}$
  - 13: **end while**
  - 14: **return**  $x, SP'$
- 

### A.3.2 Reallocation

---

#### Algorithm 2 Reallocation

---

**Input:** Learnable Parameter  $R$ , assignable bit-width  $c$ , Mixed-Precision quantization mask  $x$ , gradient vector  $\mathbf{g}$ , sorting results in Greedy Allocation  $SP$ .

**Output:** Mixed-Precision quantization Mask  $x$ , reduction of compression noise  $h$ .

- 1:  $\bar{k} \leftarrow \frac{Rc}{8}$  // Constraint Value  $\bar{k}$  for Length.
  - 2:  $k \leftarrow \sum_{i=1}^d \sum_{j=2}^4 x_{ij}$  // Get  $k$  from the Last Reallocation.
  - 3:  $h \leftarrow 0, f \leftarrow 0$  // Initialize the compression noise reduction amount  $h$  and the fine-tuning flag  $f$ .
  - 4:  $\Delta k = k - \bar{k}$  // Retrieve the number of fine-tuning iterations.
  - 5: **for**  $i = 1$  to  $|\Delta k|$  **do**
  - 6:      $x', f \leftarrow finetuning(x, SP, \Delta k, f)$  // Fine-tuning the mask according to the rules mentioned in the main text.
  - 7:      $\Delta h = h(g, x') - h(g, x)$  // Calculate the difference in compression noise before and after fine-tuning.
  - 8:     **if**  $\Delta h < 0$  **then**
  - 9:          $x \leftarrow x'$  // Keep only the fine-tuning attempts
  - 10:         that result in a reduction of compression noise.
  - 11:          $h \leftarrow h + \Delta h$  // Update the reduction of
  - 12:         compression noise.
  - 13:     **end if**
  - 14: **end for**
  - 15: **return**  $x, h$
-

---

**Algorithm 3** Fine-tuning

---

**Input:** Mixed-Precision quantization mask  $x$ , sorting results in Greedy Allocation  $SP$ , difference between the constraint length and the current length  $\Delta k$ , fine-tuning flag  $f$ .

**Output:** Mixed-Precision quantization mask  $x$ .

```
1: if  $\Delta k < 0$  then
2:   if  $f = 0$  then
3:      $x_{i_1, j_4} \leftarrow 0, x_{i_1, j_3} \leftarrow 1$ 
4:      $x_{i_2, j_2} \leftarrow 0, x_{i_2, j_3} \leftarrow 1$ 
5:      $x_{i_3, j_1} \leftarrow 0, x_{i_3, j_2} \leftarrow 1$ 
6:      $f \leftarrow 1$ 
7:   //  $i_1$  represents the least ranked 8-bit gradient,  $i_2$  represents
   // the highest ranked 2-bit gradient, and  $i_3$  represents
   // the highest ranked 0-bit gradient.
8:   else
9:      $x_{i_1, j_3} \leftarrow 0, x_{i_1, j_2} \leftarrow 1$ 
10:     $x_{i_2, j_1} \leftarrow 0, x_{i_2, j_2} \leftarrow 1$ 
11:     $f \leftarrow 0$ 
12:  //  $i_1$  represents the least ranked 4-bit gradient,  $i_2$  represents
   // the highest ranked 0-bit gradient.
13:  end if
14: else
15:   if  $f = 0$  then
16:      $x_{i_1, j_3} \leftarrow 0, x_{i_1, j_4} \leftarrow 1$ 
17:      $x_{i_2, j_3} \leftarrow 0, x_{i_2, j_2} \leftarrow 1$ 
18:      $x_{i_3, j_2} \leftarrow 0, x_{i_3, j_1} \leftarrow 1$ 
19:      $f \leftarrow 1$ 
20:  //  $i_1$  represents the highest ranked 4-bit gradient,  $i_2$  represents
   // the least ranked 4-bit gradient, and  $i_3$  represents the
   // least ranked 2-bit gradient.
21:  else
22:     $x_{i_1, j_2} \leftarrow 0, x_{i_2, j_3} \leftarrow 1$ 
23:     $x_{i_2, j_2} \leftarrow 0, x_{i_2, j_1} \leftarrow 1$ 
24:     $f \leftarrow 0$ 
25:  //  $i_1$  represents the highest ranked 2-bit gradient,  $i_2$  represents
   // the least ranked 2-bit gradient.
26:  end if
27: end if
28: return  $x, f$ 
```

---

**A.3.3 JointSQ in Distributed Learning**

---

**Algorithm 4** JointSQ in Distributed Learning

---

**Input:** The gradients for the current iteration of training  $\mathbf{g}$ , the compression ratio  $C$ , the number of Reallocation performed  $T$ , the number of nodes in distributed training  $N$ , the initial value  $R_0$ , the learning rate of  $R$   $\delta_h$ .

**Output:** The compressed gradients  $\hat{\mathbf{g}}$ .

```
1: On each node:
2:   for each layer's gradient vector  $\mathbf{g}_l$  in  $\mathbf{g}$  do
3:      $c \leftarrow 32 * \text{len}(\mathbf{g}_l) * C$ 
4:      $x, SP \leftarrow \text{GreedyAllocation}(c, \mathbf{g}_l)$ 
5:     for  $i = 1$  to  $T$  do
6:        $x_i, h_i \leftarrow \text{Reallocation}(R_{i-1}, c, x_{i-1}, \mathbf{g}_l, SP)$ 
7:        $R_i \leftarrow R_{i-1} + \delta_h(h_i - h_{i-1})$ 
8:     end for
9:      $\hat{\mathbf{g}}_l \leftarrow \text{Quantize}(\mathbf{g}_l, x)$ 
10:  end for
11: All-reduce:  $\hat{\mathbf{g}} \leftarrow \sum_{i=1}^N \hat{\mathbf{g}}$ 
12: return  $\hat{\mathbf{g}}$ 
```

---

**References**

- [1] Guangfeng Yan, Tan Li, Shao-Lun Huang, Tian Lan, and Linqi Song. AC-SGD: Adaptively compressed SGD for communication-efficient distributed learning. *IEEE Journal on Selected Areas in Communications*, 40(9):2678–2693, 2022. 1
